# Supplementary material for: Phytophthora palmivora establishes tissue-specific intracellular infection structures in the earliest divergent land plant lineage
Source: PubMed Central journal article supplement — Proc Natl Acad Sci U S A. 2018 Apr 3;115(16):E3846–55. doi: 10.1073/pnas.1717900115 (PMC5910834; doi:10.1073/pnas.1717900115), 2018-04-03
Supplement: pnas.1717900115.sapp.pdf [file pnas.1717900115.sapp.pdf]

## SUPPORTING INFORMATION (SI) APPENDIX

### SUPPORTING TABLES:

**S1 Table. Comparison of *P. palmivora* transcriptomes**

|                                        | <i>In planta</i> upregulated transcripts in<br><i>LILI/N. benthamiana</i> [1] and<br>ARI/Marchantia | Transcripts upregulated only<br>in ARI/Marchantia |
|----------------------------------------|-----------------------------------------------------------------------------------------------------|---------------------------------------------------|
| <b>Overall</b>                         | 784(37%)                                                                                            | 1347                                              |
| <b>Candidate Secreted<br/>Proteins</b> | 219(53%)                                                                                            | 196                                               |
| <b>Candidate RXLR<br/>Effectors</b>    | 42(45%)                                                                                             | 52                                                |

**S2 Table. Plants Used in This Study**

| Name/Strain                       | Species                      | Reference/Source                              |
|-----------------------------------|------------------------------|-----------------------------------------------|
| <b>TAK1</b>                       | <i>Marchantia polymorpha</i> | Jim Haseloff (University of Cambridge)        |
| <i>nop1</i>                       | <i>Marchantia polymorpha</i> | [2] Ishizaki et al. 2013                      |
| <i>MpSYP13A:mCitrine-MpSYP13A</i> | <i>Marchantia polymorpha</i> | [3] Kanazawa et al. 2016                      |
| <i>MpSYP13B:mCitrine-MpSYP13B</i> | <i>Marchantia polymorpha</i> | [3] Kanazawa et al. 2016                      |
| <i>35S:mCitrine-MpRab7</i>        | <i>Marchantia polymorpha</i> | This Study                                    |
| <i>35S:mCitrine-MpRab11A</i>      | <i>Marchantia polymorpha</i> | This Study                                    |
| <i>MpPRX:GUS</i>                  | <i>Marchantia polymorpha</i> | This Study                                    |
| <i>N/A</i>                        | <i>Marchantia paleacea</i>   | Pierre-Marc Delaux (Paul Sabatier University) |
| <i>N/A</i>                        | <i>Lunularia cruciata</i>    | Pierre-Marc Delaux (Paul Sabatier University) |

**S3 Table. Pathogen Strains Used in This Study**

| Organism                      | Strain (Accession)   | Reference                       |
|-------------------------------|----------------------|---------------------------------|
| <i>Phytophthora infestans</i> | Pi88069-td           | [4] Chaparro-Garcia et al. 2011 |
| <i>Phytophthora palmivora</i> | ARI-tdTomato (P3914) | [5] Le Fevre et al. 2016        |
| <i>Phytophthora palmivora</i> | ADA (P7551)          | [5] Le Fevre et al. 2016        |
| <i>Phytophthora palmivora</i> | ALOHA (P6053)        | [5] Le Fevre et al. 2016        |
| <i>Phytophthora palmivora</i> | FLIMA (P7545)        | [5] Le Fevre et al. 2016        |
| <i>Phytophthora palmivora</i> | FLIP (P7548)         | [5] Le Fevre et al. 2016        |
| <i>Phytophthora palmivora</i> | FRED (P7547)         | [5] Le Fevre et al. 2016        |
| <i>Phytophthora palmivora</i> | JAKO (P3738)         | [5] Le Fevre et al. 2016        |
| <i>Phytophthora palmivora</i> | MAZI (P6375)         | [5] Le Fevre et al. 2016        |
| <i>Phytophthora palmivora</i> | TAZI (P6802)         | [5] Le Fevre et al. 2016        |
| <i>Phytophthora palmivora</i> | STITCH (P0113)       | [5] Le Fevre et al. 2016        |

**S4 Table. Primers Used in This Study**

| Primer Name              | Sequence (5-3)                        | Reference                     |
|--------------------------|---------------------------------------|-------------------------------|
| <i>qRT-PCR Primers:</i>  |                                       |                               |
| MpACT-qF                 | AGGCATCTGGTATCCACGAG                  | [6] Saint-Marcoux et al. 2015 |
| MpACT-qR                 | ACATGGTCGTTCCCTCCAGAC                 | [6] Saint-Marcoux et al. 2015 |
| MpEF1a-qF                | CCGAGATCCTGACCAAGG                    | [6] Saint-Marcoux et al. 2015 |
| MpEF1a-qR                | GAGGTGGGTACTCAGCGAAG                  | [6] Saint-Marcoux et al. 2015 |
| MpSYP13A-qF              | CCAGGTTTCAGCAGTAAGCCA                 | This Study                    |
| MpSYP13A-qR              | TTTCTCTCTACCGTTCCCG                   | This Study                    |
| MpSYP13B-qF              | CGAAATGAGCACGAACGGGA                  | This Study                    |
| MpSYP13B-qR              | CCAGCTTCTTCAGCAGCGAC                  | This Study                    |
| MpPRX-qF                 | ATTCGATTGCTTCCGAGGC                   | This Study                    |
| MpPRX-qR                 | AATCCACATCCCCGAAGTT                   | This Study                    |
| MpDIR-qF                 | AGACTTCGGTTTCCAGCTGA                  | This Study                    |
| MpDIR-qR                 | TATGCCTCCTTGCTTCCAC                   | This Study                    |
| Ppal_03573p06550_06960qF | GCAACAATCGTCATCTTCTCC                 | This Study                    |
| Ppal_03573p06550_06960qR | ATCGAGTCGTCAGTGTAGG                   | This Study                    |
| Ppal_08171n02473_03033qF | GTCAAAACATTGTCCGAGTTCA                | This Study                    |
| Ppal_08171n02473_03033qR | GGCGGATATCTACATCACCTTC                | This Study                    |
| Ppal_05494p02665_03135qF | ACCAAGGAACAACCGTTTGCC                 | This Study                    |
| Ppal_05494p02665_03135qR | CCTTGCCGCTTATGAGTAGAGT                | This Study                    |
| Ppal_06531n05739_06188qF | GACTGATCAAGCACACCACACT                | This Study                    |
| Ppal_06531n05739_06188qR | AGCTGGTCAGGAATCTCTCTGT                | This Study                    |
| Ppal_03660p04152_04550qF | CAGTTCTTACAAGCGTCATGC                 | This Study                    |
| Ppal_03660p04152_04550qR | TCTGTCCGATCGTTGTTTTG                  | This Study                    |
| Ppal_18465n22905_2647qF  | TGCTTTTGTGGAGTGTACTGCT                | This Study                    |
| Ppal_18465n22905_2647qR  | CGTTAAATCCGCTGTTATGTCA                | This Study                    |
| PpEF1a-qF                | CAAGATCCCGTTCGTGCCTA                  | [5] Le Fevre et al. 2016      |
| PpEF1a-qR                | GCGTTCAGGTTGTCAAGAGC                  | [5] Le Fevre et al. 2016      |
| PpWS21-qF                | CTCCAGAACGTGTACATTCG                  | [1] Evangelisti et al. 2017   |
| PpWS21-qR                | TGGCACCCCTTCTCCTCGG                   | [1] Evangelisti et al. 2017   |
| PpCdc14-qF               | TCTGCACGAGTTCAGCATT                   | [5] Le Fevre et al. 2016      |
| PpCdc14-qR               | CACCACTAGCGTCACGTTCT                  | [5] Le Fevre et al. 2016      |
| PpHmp1-qF                | TGCCATTCTTGATCTGCCGT                  | [5] Le Fevre et al. 2016      |
| PpHmp1-qR                | GACGATGCGAAAAGGGCTTC                  | [5] Le Fevre et al. 2016      |
| REX1-qF                  | TCTCTTATCCAGACGAGCAACA                | [1] Evangelisti et al. 2017   |
| REX1-qR                  | TGACGTAGCCCTTGTAGATTGA                | [1] Evangelisti et al. 2017   |
| REX3-qF                  | AGTCCAAGAAGGATTTGACGAC                | [1] Evangelisti et al. 2017   |
| REX3-qR                  | TTCTCTAACGCATTAGCCTTCC                | [1] Evangelisti et al. 2017   |
| REX4-qF                  | CAGAACGACAACGAATGGTATC                | [1] Evangelisti et al. 2017   |
| REX4-qR                  | TCGGCAATAAGCCTTTAAATTG                | [1] Evangelisti et al. 2017   |
| PiWS21-qF                | CTCCAAAACGTGTACATCCGTAAGTGC           | This Study                    |
| PiWS21-qR                | CCTTAGCACCCCTTCTCCTCAGCACC            | This Study                    |
| PiCdc14-qF               | TCTGCACGAGTTCAGCACTATGAAC             | This Study                    |
| PiCdc14-qR               | CCTGCAAAGGCTATGAACTGGGTG              | This Study                    |
| PiHmp1-qF                | CATGATGGCTGTATGGTCGGTGAGG             | [7] Schoina et al. 2017       |
| PiHmp1-qR                | TTAGCTAACATTCAAGCGAGCATGAAG           | [7] Schoina et al. 2017       |
| PiAVR3a-qF               | CGCCATAAACTTTGCAACCA                  | [7] Schoina et al. 2017       |
| PiAVR3a-qR               | TGCCGGCTGAATCGTGTAT                   | [7] Schoina et al. 2017       |
| PiAVRblb2-qF             | CGTCGCAGCATTCCCAAT                    | [7] Schoina et al. 2017       |
| PiAVRblb2-qR             | GCCACAGTGTCAAGGAGATGTCTT              | [7] Schoina et al. 2017       |
| <i>Cloning Primers:</i>  |                                       |                               |
| MpRab7-B1F               | AAAAAGCAGGCTcATGTCAGCTCGTAAACGAACTCTG | This Study                    |
| MpRab7-B2R               | AGAAAGCTGGGTTTCAGCATTACAGACAGATGACT   | This Study                    |
| MpRab11A-B1F             | AAAAAGCAGGCTcATGGCTTATAGATCCGACGATG   | This Study                    |
| MpRab11A-B2R             | AGAAAGCTGGGTTTACGCTGAGCAACATCCTACT    | This Study                    |

## SUPPORTING METHODS

### Histochemical Staining

GUS staining was performed in mock (water) or infected (*P. palmivora* ARI-td) plants 4 days post inoculation (dpi) essentially as described in [1], except that *M. polymorpha* thalli (TAK1 and *MpPRX*:GUS) were vacuum infiltrated with the GUS staining solution. Thalli were de-stained in a solution containing 70% ethanol and 20-30% glycerol. De-stained thalli were sectioned using a vibratome and imaged using the 3D display option on a Keyence digital microscope. DAB (diaminobenzidine) staining for the detection of H<sub>2</sub>O<sub>2</sub> was performed on mock (water) or infected (*P. palmivora* ARI-td) plants 4 days post inoculation (dpi) as described in [8]. Three-week old *M. polymorpha* plants were used for all histochemical staining experiments.

### Phylogenetic Analysis

Amino acid sequences retrieved from phytozome (<https://phytozome.jgi.doe.gov/pz/portal.html>) and MarpolBase ([www.marchantia.info](http://www.marchantia.info)) were aligned using MUSCLE. The evolutionary history was inferred by the Maximum Likelihood method utilizing the Jones, Taylor & Thornton model with discrete Gamma distribution using MEGA 6 [9]. Ten thousand bootstrap replicates were conducted, and percent bootstrap values were placed on corresponding branches. The tree was drawn in MEGA 6.0

### Comparison of *P. palmivora* expression patterns in *M. polymorpha* and *N. benthamiana* pathosystems

To compare *P. palmivora* expression patterns in *M. polymorpha* and *N. benthamiana* [1] pathosystems we applied standardized analysis approach. Reads from *P. palmivora* LILI - *N. benthamiana* experiment were mapped back to the same *P. palmivora* reference genome [10] using STAR (version 2.5.2b) aligner [11]. Similar to *P. palmivora*-ARI *M. polymorpha* analysis, raw counts were obtained with FeatureCounts [12]. Uniquely mapped and properly paired reads were considered further. Differentially expressed genes were obtained applying EdgeR methodology [13,14] for both *P. palmivora*-LILI *N. benthamiana* and *P. palmivora*-ARI *M. polymorpha* datasets. In the absence of replicates in *P. palmivora*-LILI *N. benthamiana* dataset 6-18-24 hai and 48-72 hai samples were treated as pseudo-replicates for biotrophic and necrotrophic stages. To get a subset of genes up-regulated *in planta* we compared infected samples against respective *ex-planta*

stage: MZ - for *P. palmivora*-LILI *N. benthamiana* and MYC - for *P. palmivora*-ARI *M. polymorpha*. Lists of *in planta* up-regulated genes (LFC  $\geq$  2, adjusted p-value  $<$   $10^{-3}$ ) in both pathosystems were compared using UpSetR package [15].

***MpPRX* (Mapoly0106s0049) Promoter + 5' UTR:**

GATCTCAACGTTTCTGGCTGAGAGTGTGTTCCACAATTCTGGAAGCGTTTCATGGCTGAGCGAGTTAGAA  
GAATCGATTACCTTCTGCTTCTAATCATCACAGAAATTAATGTATCAGAATGCTCAGACATTACTAGATGA  
AAAGGGAAATGCAAAGATTGCAAACGTAAGAGTTGCAGTCGGAATTTCTTCCAGGGTTACGAATTGGGA  
CTAGCGTCAACGTCATAATAACAGCCCAAGATAGTGGCCTTGTGCATGTCGGCTTTGTGCATAGAATGA  
CGTGTATCTAATCACATGCACATCATTCTGCACAAGGTCTTGCATACTTGCATTGGCTTGTAAAGCTCGAG  
CAATCTAATTGCAGCATTCTAACCCTCAGAGAATTCCTAACCCTTTTCGCATGCAAATTAGTATACAAAA  
GATTGCATCTAGAAGGTGTAATGATGCATGTTCTATACCTAGAGTAGGAGAGATTTATCATGAGAACAAAT  
AAACTCTGGTGTGAATCTAGAAAGAGGGTTTTCTTTGCGGTATGTAGCCATCGTGTATCCGCAACTAAC  
GCGCTATCATCCTTTGCAAATTGGGACTCCTAGCCGCCATCTTAAACACACCAGCCTCCAGAATTGGGG  
TCGGAGACTGCAACTTCCC GCCCTACGCATGGTCAGGTCAAACGTAAACCAGGGCTTTCACTGAATTGT  
TAGCGTTTCCCAGCCGCCGAAAATGTCTGCGTCGGCCAAATGTAGCTTGAACATAATCGCACATTTTTCT  
CACCACGATTTTGCAAAAGATGGGGCCTATCTTTTCGTATTTACACCTTTAGCGTCCCATCACCAATT  
CGGGTCACTCGTTTGGTTCCAGATGGCGGACTGAGTGGTCGCATTGGAAGACGCTGTGCTCACATGCA  
TAGTCTACTCTTCTTCCCACCTTATCTGAAACTCGTTCCGTTGTGCTCGACTGCAAACGCCTCCAGGG  
CTTCACATGATCACGGTGTGTTGCATGCCGCGGTCAAATAAGACTCTAGAGGTCACATCTGACCAGTGCA  
GCACACACTCTAGTCTGCATGCATGCGCCTGCCGACGATGTGCGTTCTGATCGCAACTCGGCAGCAC  
ACATAGTTATCCCCGTTGGACTGCCACTTTCCAAGCCTAGGGCAGATGGGGCACAGGCAGTATCCTAT  
TGTTTATGTTTGCTTCCGAAGACTCAATACAGTCTTCTAAGGCCATCTACAAGGAAAGGAAATTTTACAA  
GGAGACTTAATATACAGGTCCCTTTTGTGTTTCTCACTGTGAATCCGAGAGCAAACACTTTTTTTTGTCTA  
TGGTCACCGGAATCGCTTCAACTTGTGCTGCGAAAGCTGCTGTAGTTATGATGACTTAGTCAAAGCTTT  
GAGTCGGATGAAAATAGACAGTTTTTGGCGCATGCCATGACCTTGTGGAACCGTTCCACATTGCCACAA  
TCTTCAGATCTACGAATCCTCGCTCTTCTGTACCAGGTCCACGTCGTACAGACATTGACGTGTAAAAGAC  
TCTCTTTAGCCGGAGTGTATATATCTCCAGGATGAGCACAGCATTCCATCCAAAGCAAACACTATCAGATT  
CAATTACTGCCTGCTCACCTGCACTCCCTGAAGTCCAGTACAATCATCCTTGGAAGGAGAATCAAGTGC  
TTCAAACCTTCAGGCGCATCGAGGATTCATATCAACTTCACAGTTTTTAGCGGAGATTCAGAGTCACCT  
TTCAGTTTTGTTCGTCGACCTGCACAAGTCGACGCCAAAGGAGCGCATCTATCAGCATTCTCACG

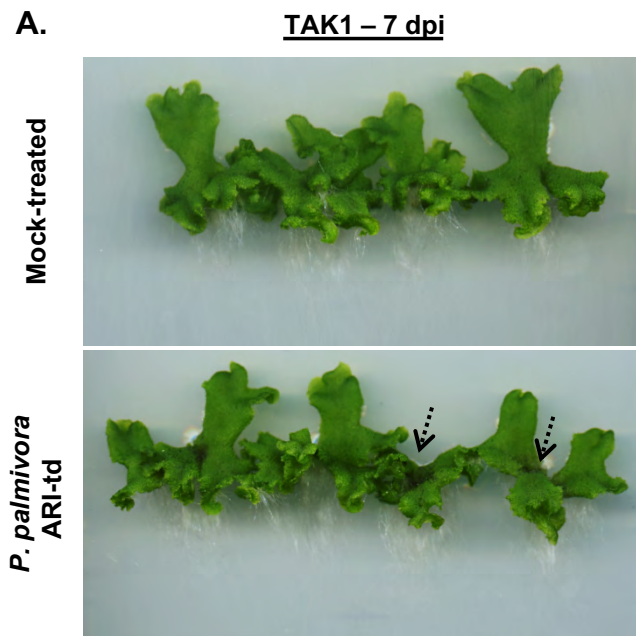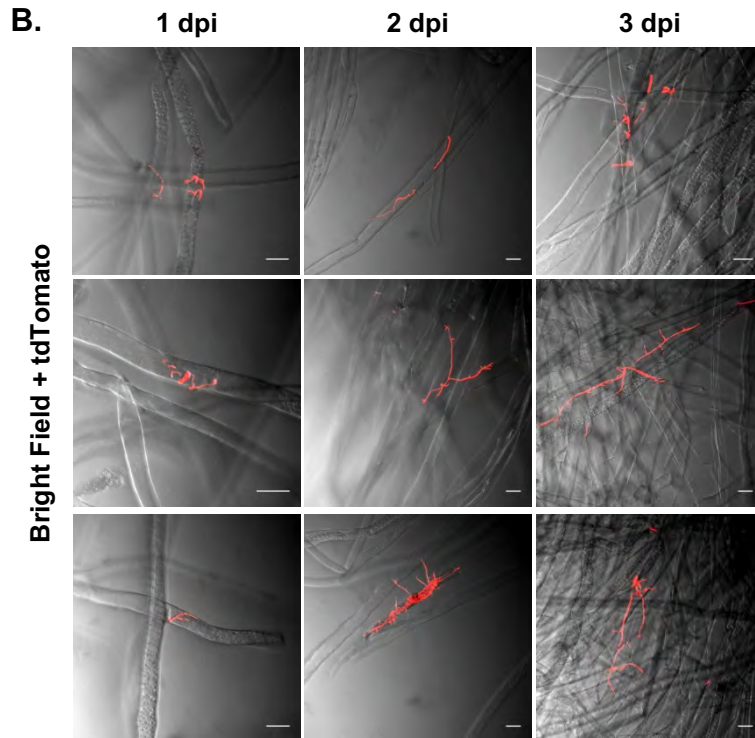

**S1 Fig. Rhizoid inoculations do not reliably lead to colonization**

**(A)** Disease symptoms at 7 days post inoculation (dpi) of 3-week-old *M. polymorpha* (TAK1) plants that were inoculated with *P. palmivora* ARI-td zoospores or water directly onto rhizoids.

**(B)** Confocal fluorescence microscopy demonstrating *P. palmivora* ARI-td growth on 3-week-old *M. polymorpha* rhizoids from 1-3 dpi. Micrographs represent z-stack projections of merged bright field and tdTomato channels. Scale bars = 50  $\mu$ m.

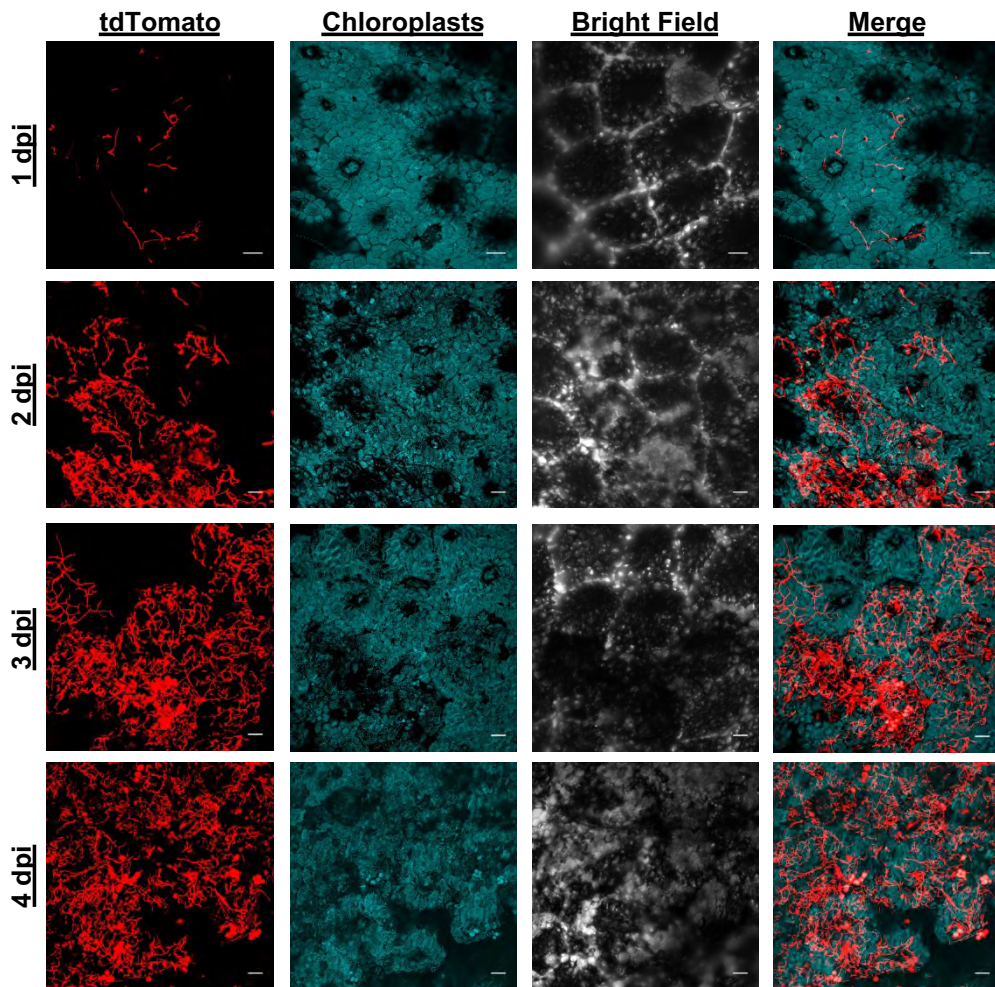

**S2 Fig. *P. palmivora* colonizes TAK1 thalli.** Confocal fluorescence microscopy demonstrating *P. palmivora* ARI-td growth on 3-week-old *M. polymorpha* thalli from 1-4 days post inoculation (dpi). Micrographs represent z-stack projections. The merged micrographs display red pathogen fluorescence (tdTomato) overlaid on top of chlorophyll autofluorescence (turquoise). Scale bars = 100  $\mu$ m.

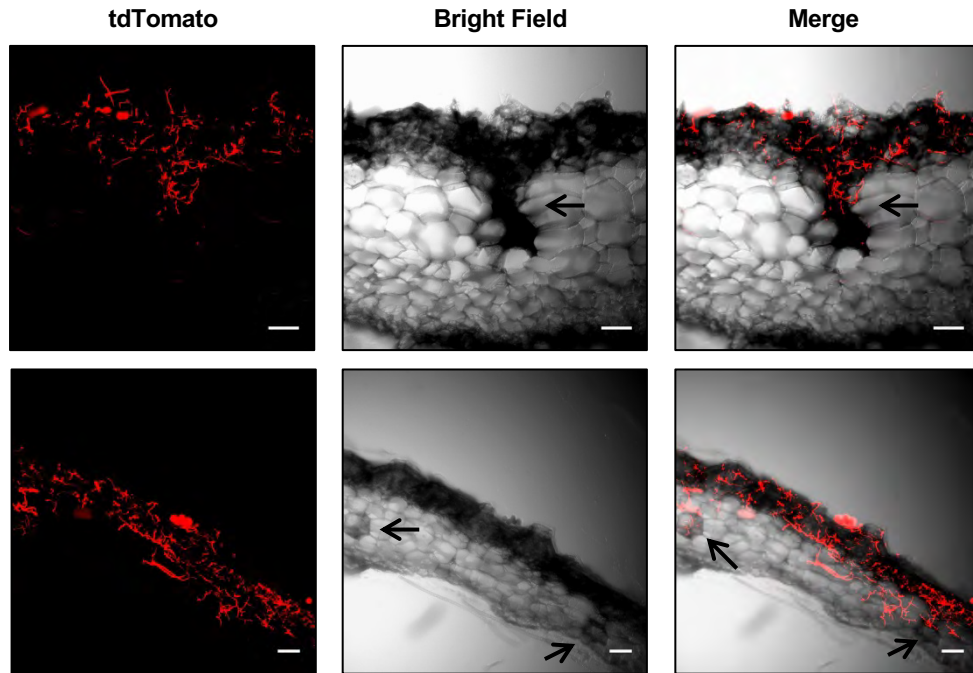

**S3 Fig. *P. palmivora* hyphae access the storage region during necrotrophy.** Confocal fluorescence microscopy demonstrating the co-occurrence of *P. palmivora* ARI-td hyphae and necrotrophic disease symptoms in the storage region of *M. polymorpha* thalli at 7 days post inoculation (dpi). Red pathogen fluorescence is merged with bright field images. Micrographs represent z-stacked images. Scale bars = 100  $\mu$ m.

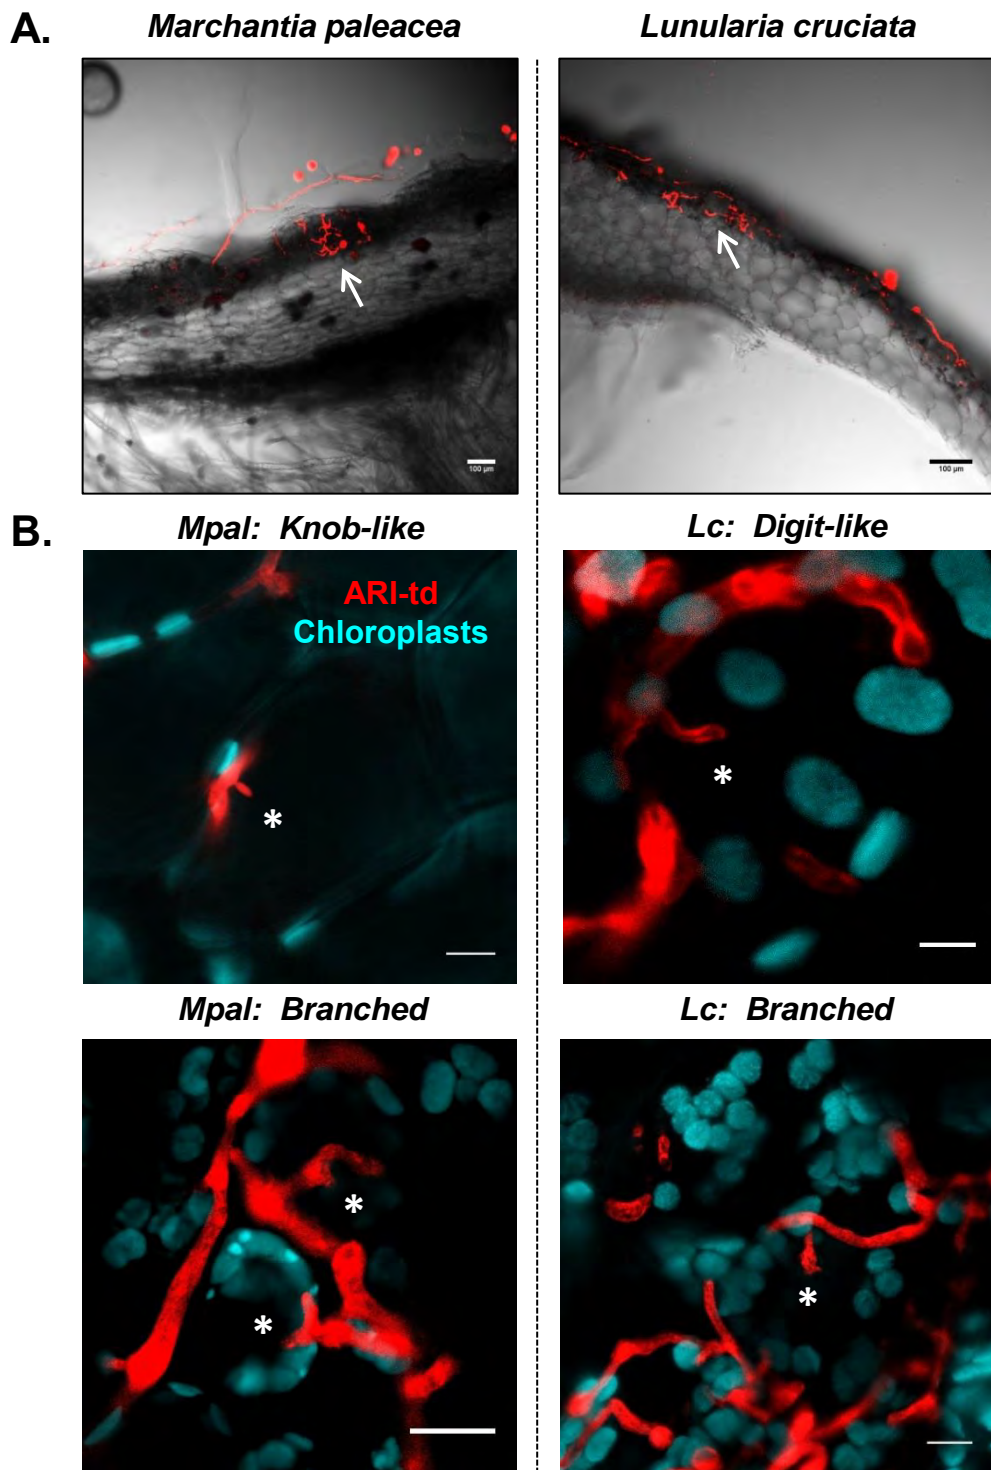

**S4 Fig. Intracellular colonization of the photosynthetic layer in *Marchantia paleacea* and *Lunularia cruciata*.**

**(A)** Confocal fluorescence microscopy of sectioned thalli of *M. paleacea* and *L. cruciata* colonized by *P. palmivora* ARI-td at 7 days post inoculation (dpi). Z-stacked images represent red pathogen fluorescence (tdTomato) merged with the bright field channel. Colonized air chambers are denoted by arrows. Scale bars = 100 µm

**(B)** Confocal fluorescence microscopy demonstrating haustoria morphology in *P. palmivora* ARI-td colonized *M. paleacea* (*Mpal*) and *L. cruciata* (*Lc*) thalli at 3 dpi. Z-stacked images display red pathogen fluorescence (ARI-td) merged with plastid autofluorescence. Scale bars = 10 µm.



### TAK1 – 7 dpi

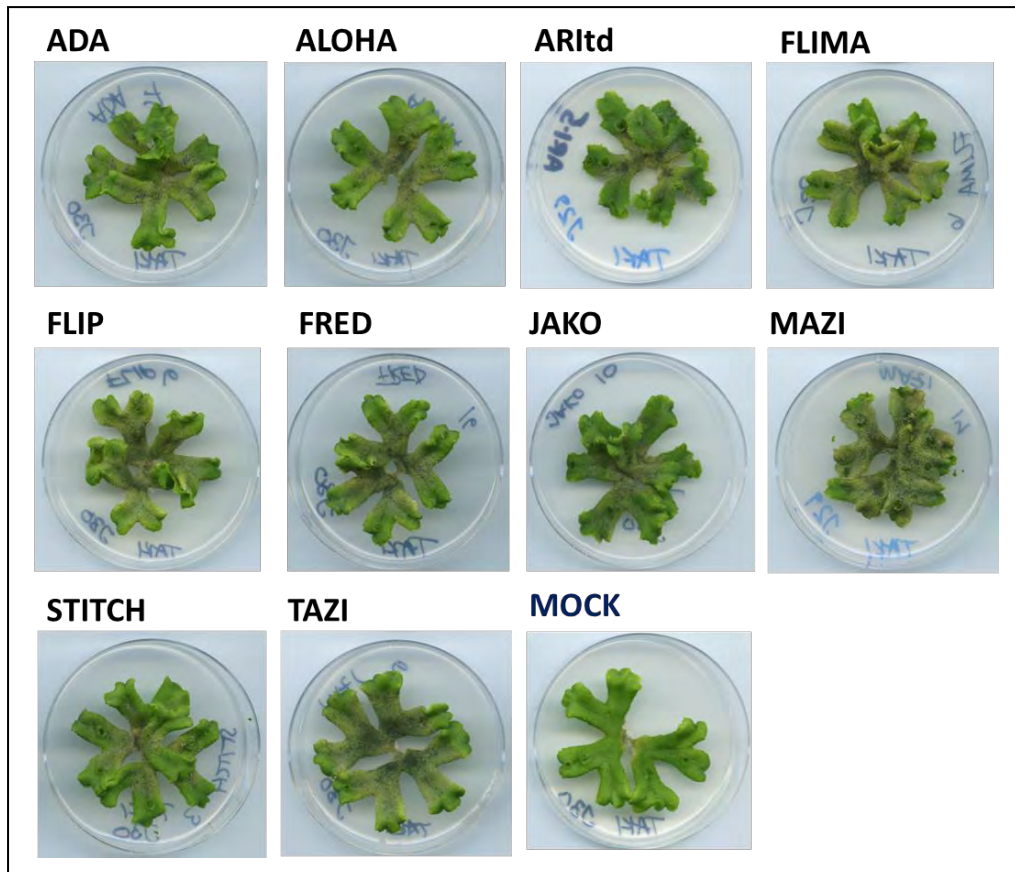

#### **S5 Fig. *P. palmivora* strains vary in aggressiveness in TAK1.**

Disease symptoms of *M. polymorpha* TAK1 plants inoculated with water (mock) or zoospores of *P. palmivora* strains 7 days post inoculation (dpi). Images displayed are representative of consistent symptoms observed from 8-16 infected plants per strain.

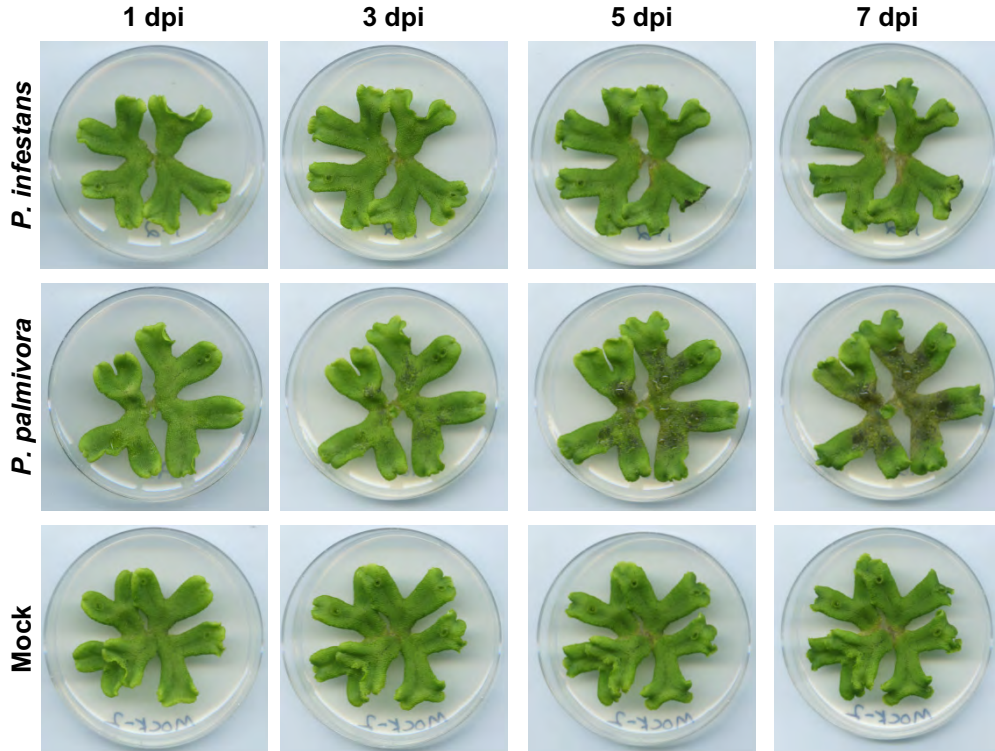

**S6 Fig. *P. infestans* does not cause disease symptoms on TAK1**

Disease progression of *M. polymorpha* TAK1 plants inoculated with water, *P. palmivora* (ARI-td) zoospores or *P. infestans* (Pi88069-td) zoospores. Images display consistent disease symptoms (n=8) at 1, 3, 5, and 7 days post inoculation (dpi).

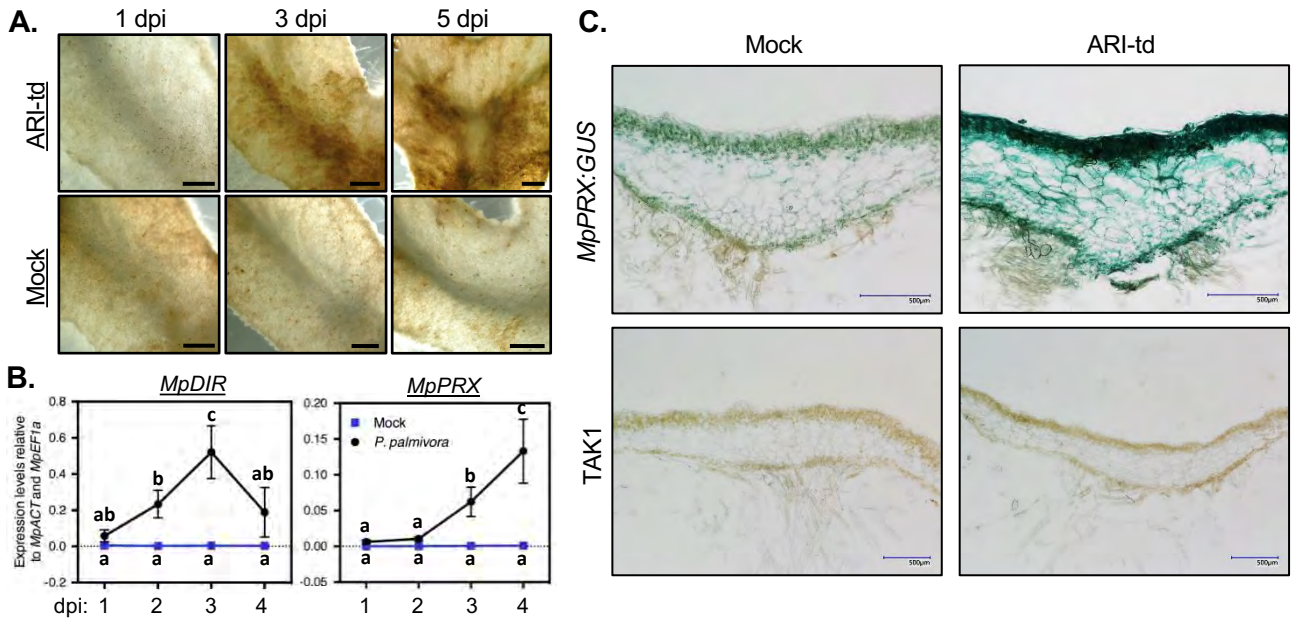

**S7 Fig. Host responses to colonization are activated in *Marchantia* air chambers.**

(A) Histochemical staining of mock-treated or *P. palmivora* ARI-td infected *M. polymorpha* TAK1 using DAB (diaminobenzidine) to detect hydrogen peroxide (H<sub>2</sub>O<sub>2</sub>) accumulation at 1, 3, and 5 days post inoculation (dpi). Scale bars = 1000 μm.

(B) qRT-PCR analysis of *MpDIR* and *MpPRX* transcripts in mock-treated (blue) and infected (*P. palmivora* ARI-td, black) *M. polymorpha* TAK1 from 1-4 dpi. Expression was quantified relative to endogenous *MpACT* and *MpEF1a* controls. Different letters indicate statistically significant differences in transcript abundance (ANOVA, Tukey's HSD,  $p < 0.05$ ).

(C) GUS staining of mock-treated and infected (*P. palmivora* ARI-td) *MpPRX:GUS* and wild-type TAK1 thalli at 4 dpi. Thalli were sectioned using a vibratome and images were collected using the 3D display option on a Keyence digital microscope. Scale bars = 500 μm.

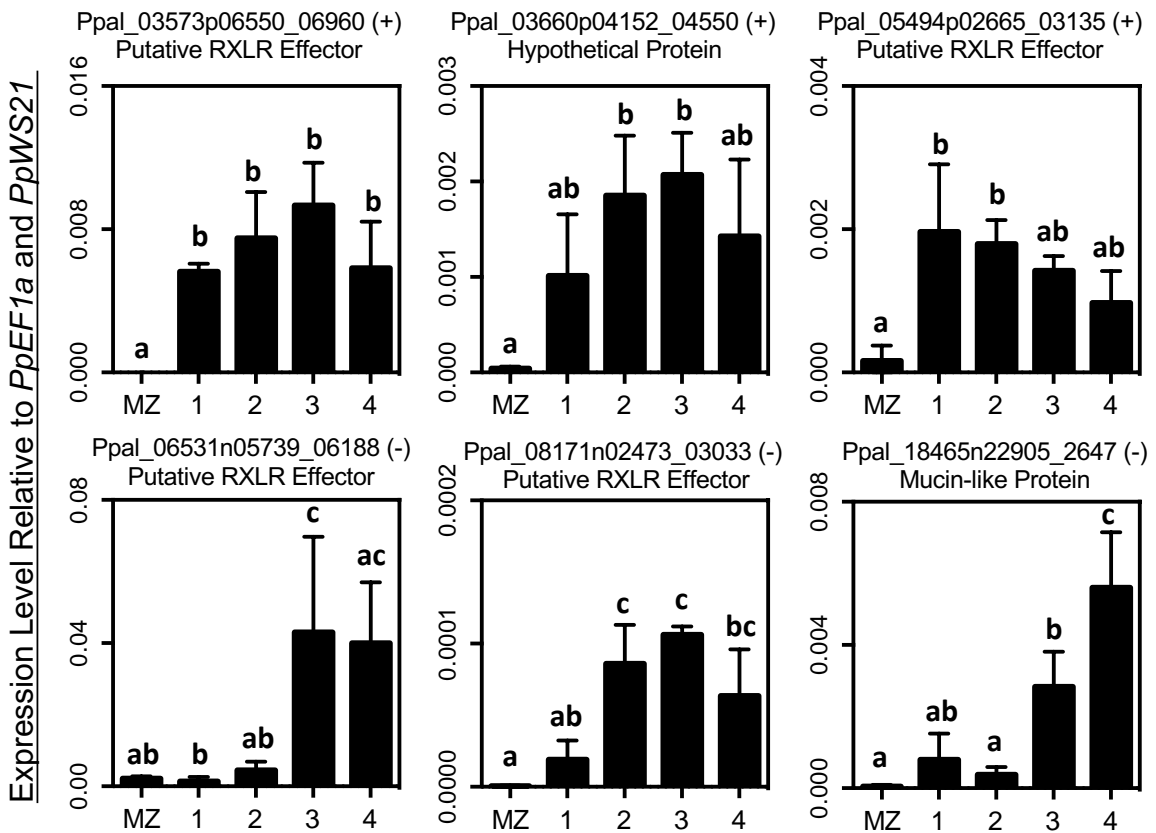

### S8 Fig. Validation of colonization-induced *P. palmivora* genes

qRT-PCR analysis of *P. palmivora* (ARI-td) genes identified by RNA-seq analyses. Expression levels were quantified in an axenically propagated MZ (mycelia + zoospores) sample and during the colonization of *M. polymorpha* thalli from 1-4 days post inoculation (dpi). Expression levels were quantified relative to internal controls *PpEF1a* and *PpWS21*. Different letters indicate statistically significant differences in expression levels (ANOVA, Tukey' HSD,  $p < 0.05$ ). Performed twice with similar results.

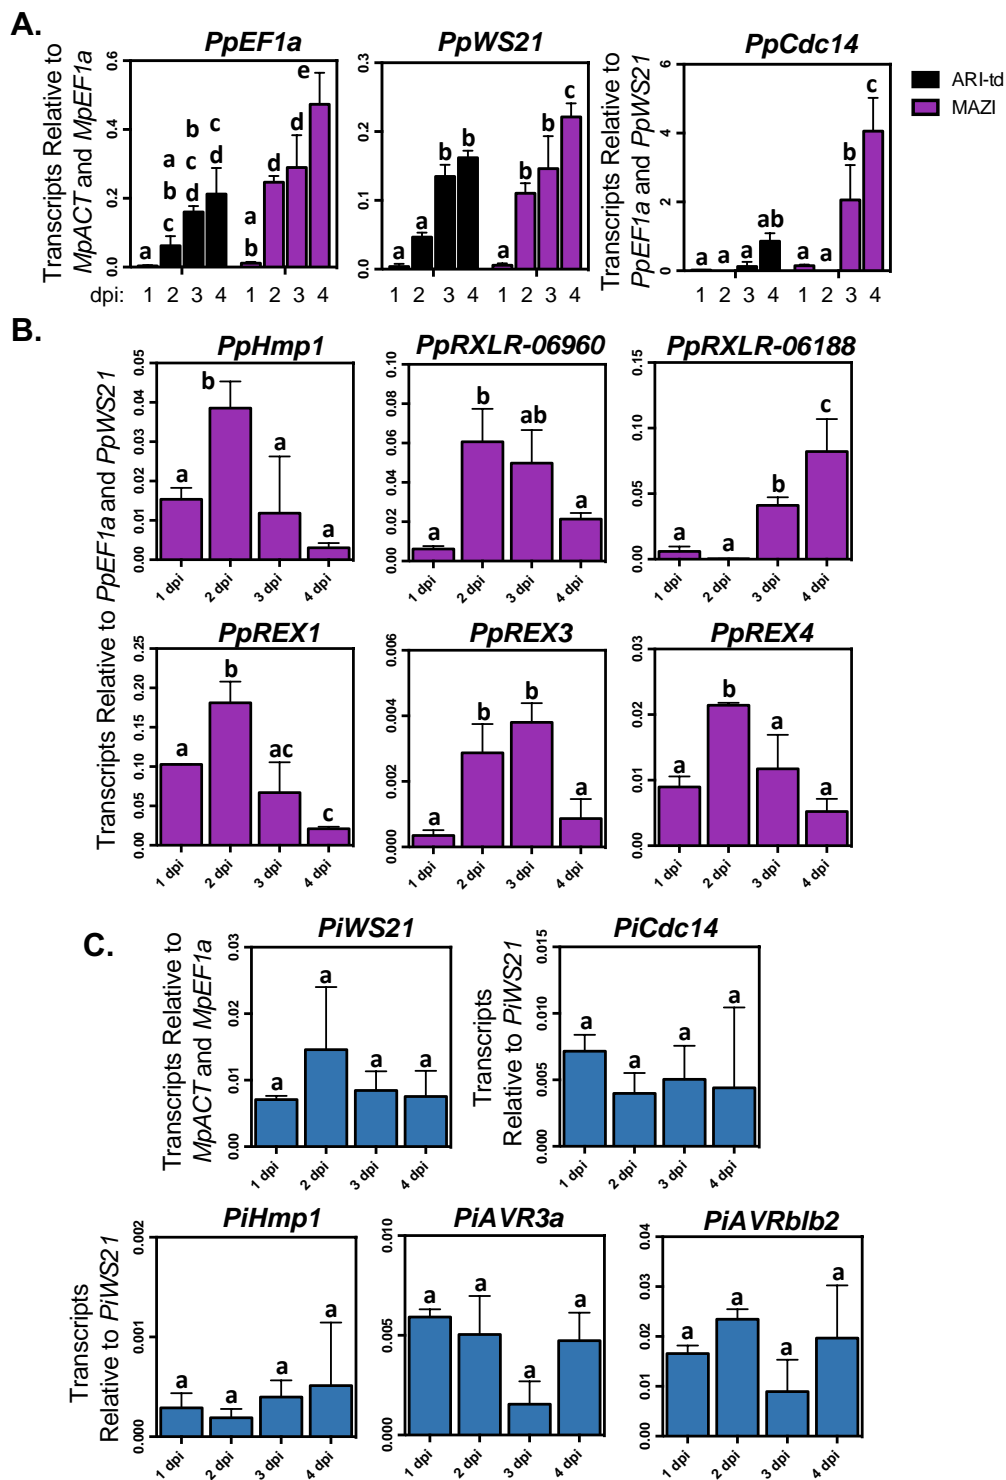

**S9 Fig. Expression analysis of *Phytophthora* lifestyle markers during compatible and incompatible interactions with *Marchantia* thalli.**

**(A)** Comparative qRT-PCR analysis of pathogen biomass (*PpEF1a* and *PpWS21*) and sporulation (*PpCdc14*) during interactions between 3-week-old *M. polymorpha* thalli and *P. palmivora* ARI-td (black) or MAZI (magenta) from 1-4 days post inoculation (dpi). **(B)** Expression analysis of haustoria-associated *PpHmp1* and RXLR effectors (*PpREX1,3,4*) in the *P. palmivora* isolate MAZI during compatible interactions with *M. polymorpha* thalli. Additional RXLR effectors *PpRXLR-06960* and *PpRXLR-06188* represent the *P. palmivora* loci Ppal\_03573p06550\_06960 (+) and Ppal\_06531n05739\_06188 (-), respectively. **(C)** Expression analysis of *P. infestans* biomass (*PiWS21*), sporulation (*PiCdc14*), haustoria-associated (*PiHmp1*), and RXLR effector genes (*PiAVR3a* and *PiAVRblb2*) during incompatible interactions with *M. polymorpha* thalli. Different letters indicate statistically significant differences in transcript levels (ANOVA, Tukey's HSD,  $p < 0.05$ ). Performed twice with similar results.

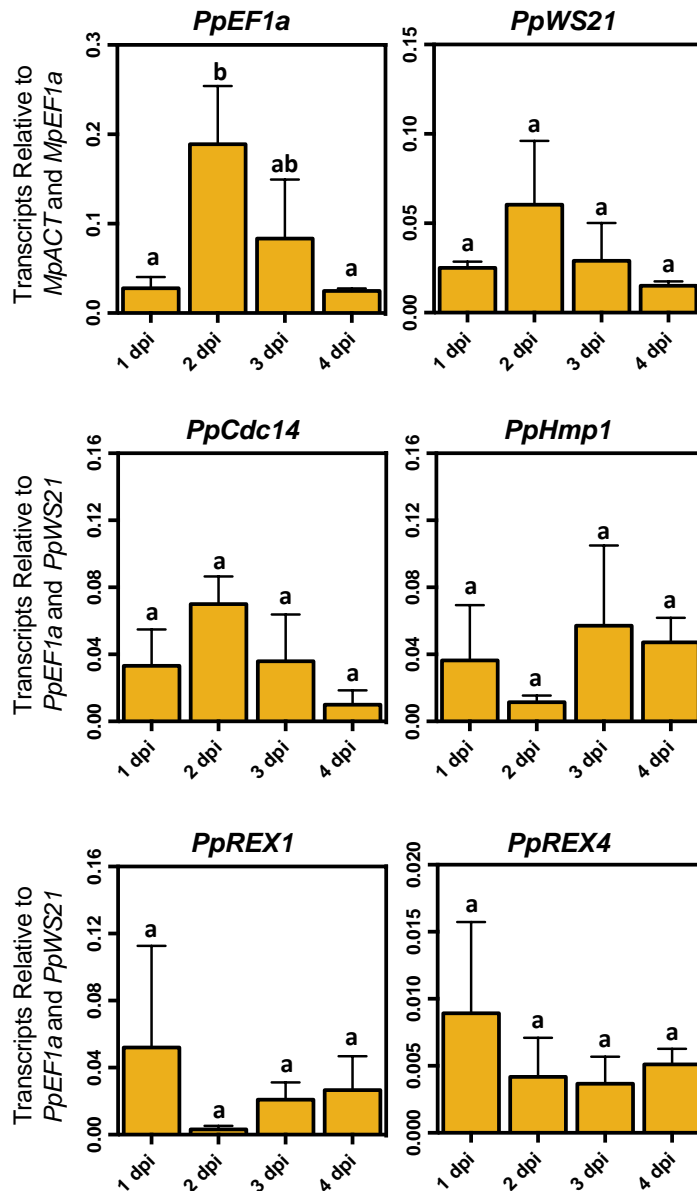

**S10 Fig. Expression analysis of *P. palmivora* lifestyle markers during incompatible interactions with *Marchantia* rhizoids.**

qRT-PCR expression analysis of pathogen biomass (*PpEF1a* and *PpWS21*), sporulation (*PpCdc14*), haustoria development (*PpHmp1*), and RXLR effectors (*PpREX1* and *PpREX4*) during interactions between 3-week-old *M. polymorpha* rhizoids and *P. palmivora* ARI-td from 1-4 days post inoculation (dpi). Different letters indicate statistically significant differences in transcript levels (ANOVA, Tukey's HSD, p < 0.05). The data are representative of two experimental replicates.

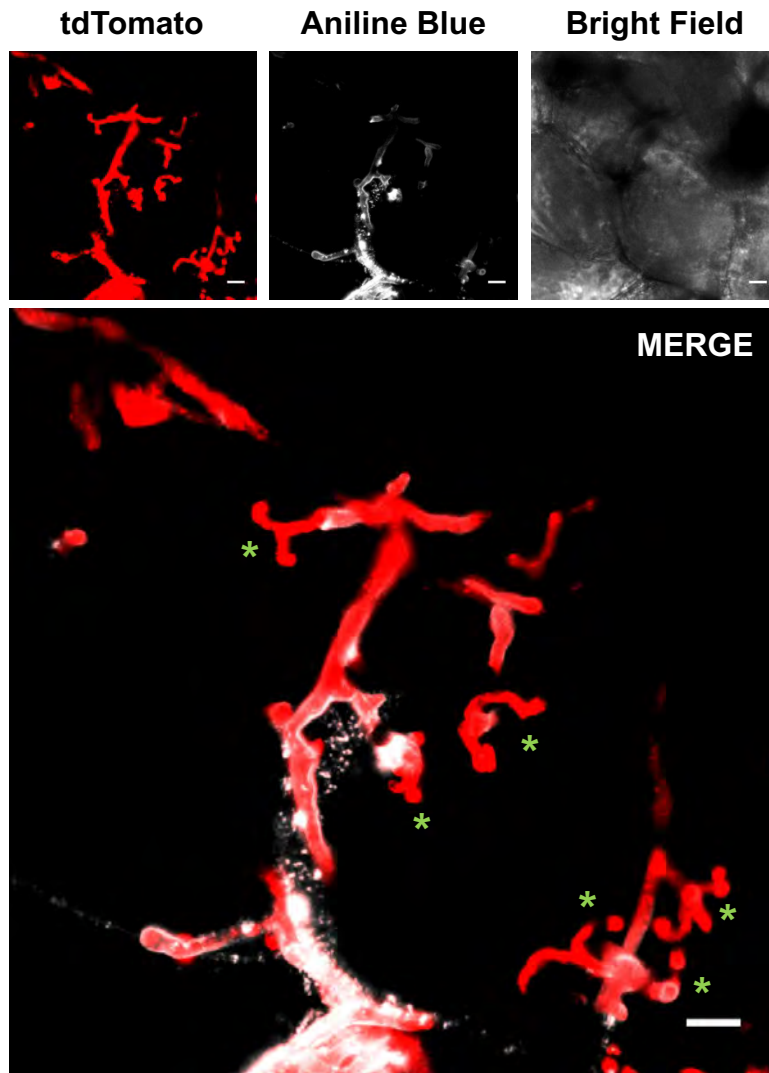

**S11 Fig. Callose does not envelope *P. palmivora* infection structures**

Confocal fluorescence microscopy of aniline blue stained *M. polymorpha* TAK1 thalli infected with *P. palmivora* ARI-td at 3 days post inoculation (dpi). Images represent z-stack projections displaying red fluorescence from the pathogen (tdTomato), callose deposition through aniline blue staining (white), bright field, or tdTomato merged with aniline blue. Asterisks (\*) denote intracellular infection structures that are not enveloped by callose.

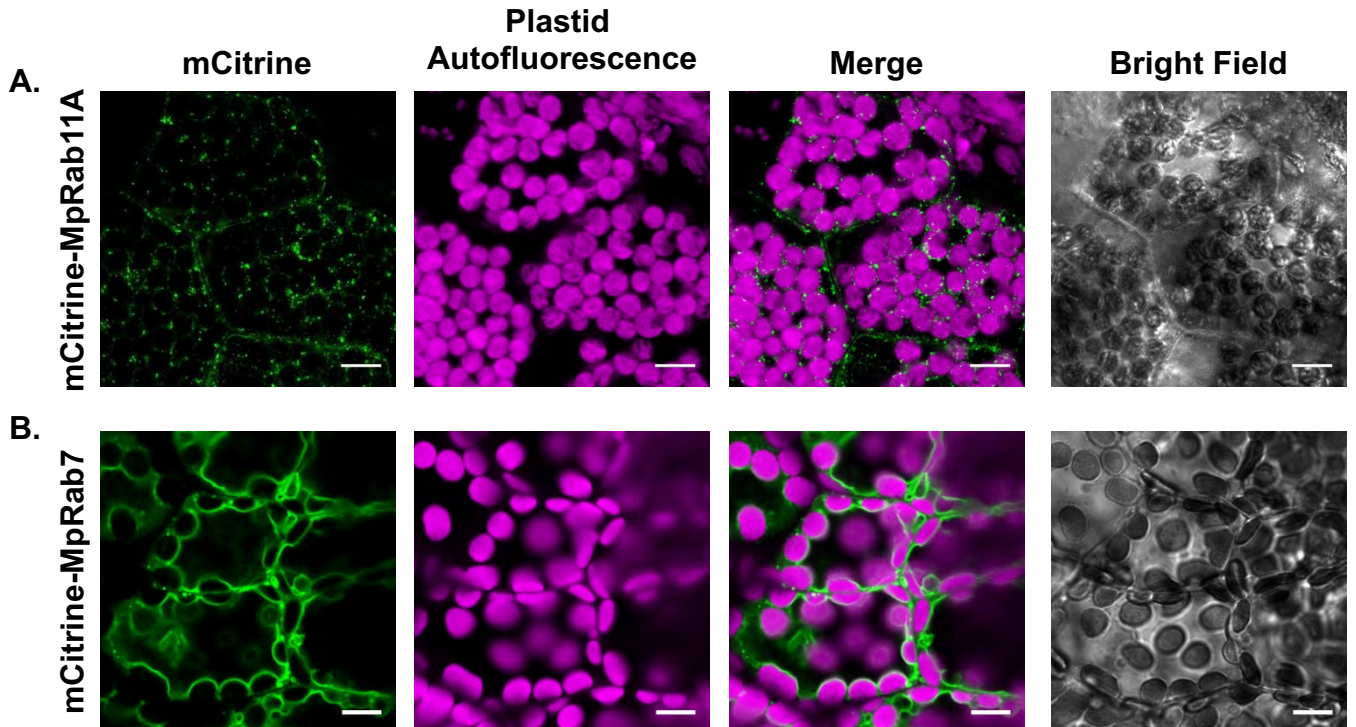

**S12 Fig. Subcellular localization of MpRab11A and MpRab7**

**(A)** Confocal fluorescence microscopy showing subcellular localization patterns of MpRab11A in 35S:mCitrine-MpRab11A/TAK1 gemmae. Micrographs display mCitrine fluorescence, plastid autofluorescence (magenta), both channels merged, or bright field images. Scale bars = 10  $\mu$ m.

**(B)** Confocal fluorescence microscopy showing subcellular localization patterns of MpRab7 in 35S:mCitrine-MpRab7/TAK1 gemmae. Micrographs display mCitrine fluorescence, plastid autofluorescence (magenta), both channels merged, or bright field images. Scale bars = 10  $\mu$ m.



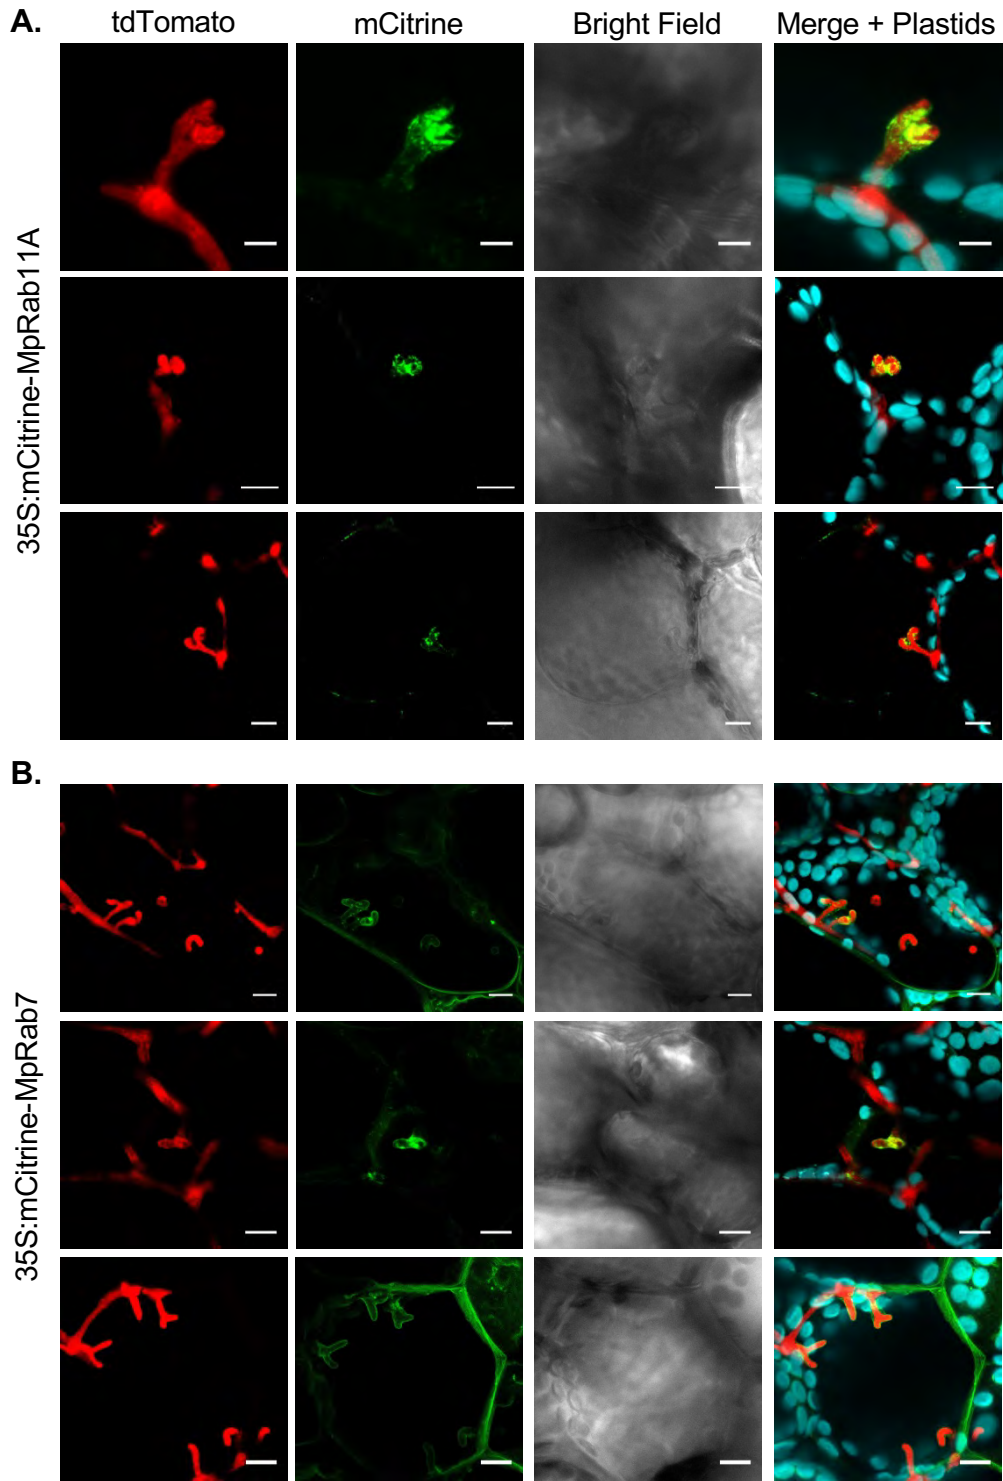

**S13 Fig. MpRab11A and MpRab7 accumulate at *P. palmivora* intracellular infection structures in living *Marchantia* cells.** Confocal fluorescence microscopy showing subcellular localization patterns of MpRab11A (**A**) and MpRab7 (**B**) in 35S:mCitrine-MpRab11A/TAK1 or 35S:mCitrine-MpRab7/TAK1 thalli infected with *P. palmivora* ARI-td at 2-3 days post inoculation (dpi). Z-stacked micrographs display tdTomato pathogen fluorescence, mCitrine fluorescence, bright field images, and a merged image displaying mCitrine, tdTomato and plastid autofluorescence (cyan), both channels merged, or bright field images. Scale bars = 10  $\mu$ m.

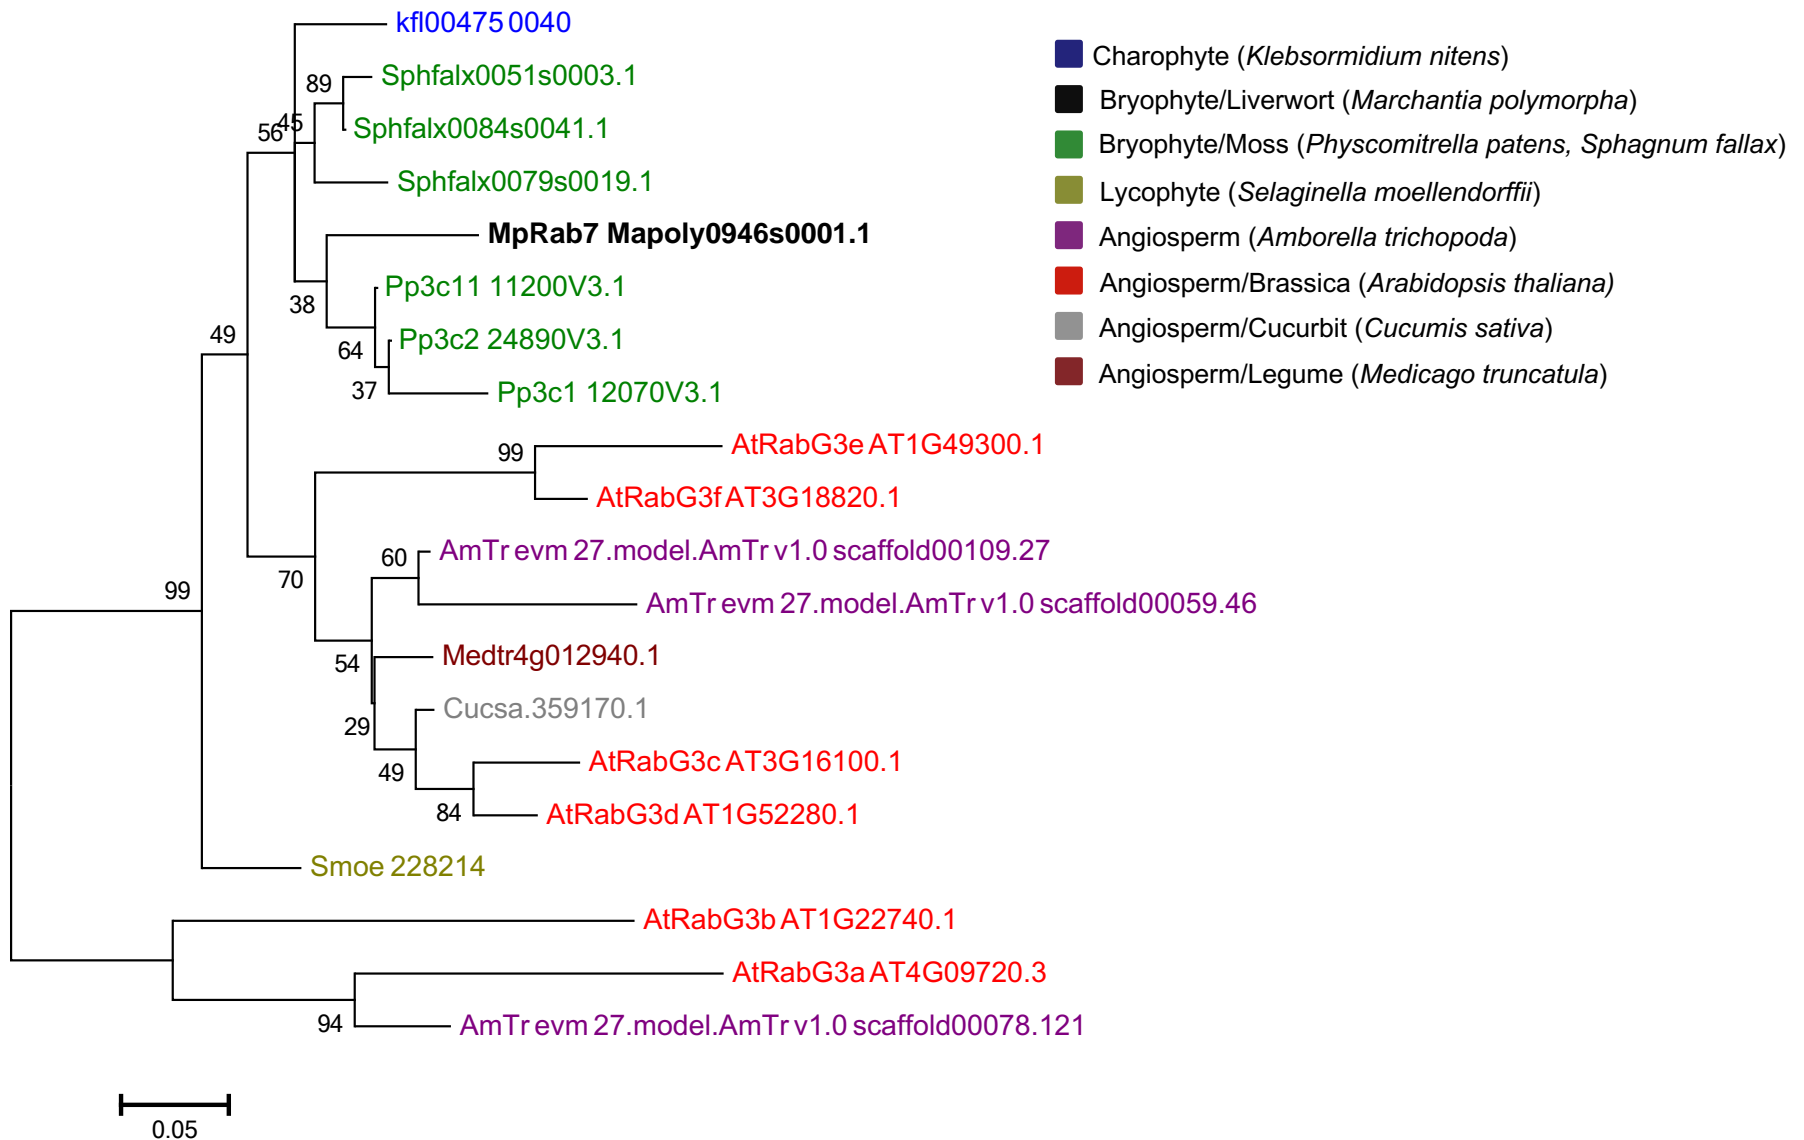

**S14 Fig. Rab7 phylogeny.** Maximum likelihood phylogram of Rab7 proteins from the green-plant lineage. Amino acid sequences were aligned using MUSCLE. The evolutionary history was inferred by the Maximum Likelihood method utilizing the Jones, Taylor & Thornton model with discrete Gamma distribution using MEGA 6. Ten thousand bootstrap replicates were conducted and percent bootstrap values were placed on corresponding branches.

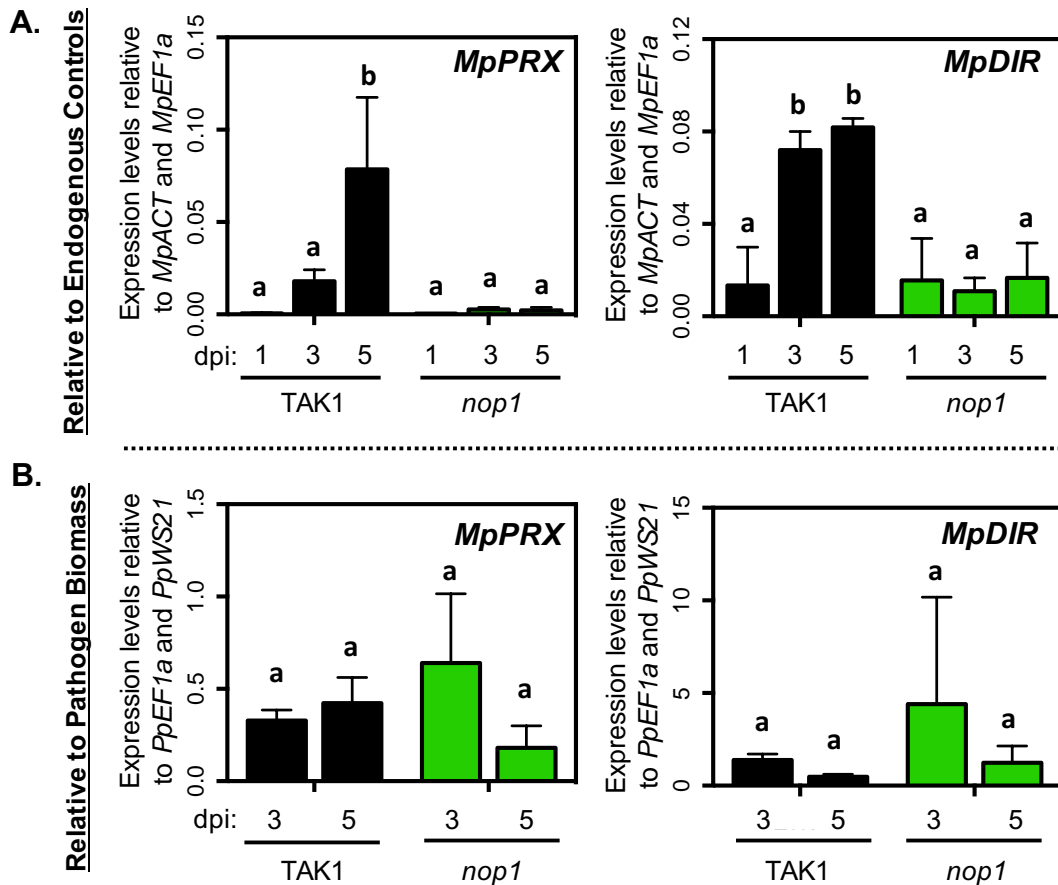

**S15 Fig. Colonization-induced *MpPRX* and *MpDIR* expression is not compromised in *nop1* mutants.**

**(A)** qRT-PCR analysis of *MpDIR* and *MpPRX* transcripts in wild-type TAK1 and *nop1* mutants at 1, 3, and 5 days post inoculation (dpi) with *P. palmivora* ARI-td in 3 week-old plants. Expression was quantified relative to endogenous *MpACT* and *MpEF1a* controls. Different letters indicate statistically significant differences in transcript abundance (ANOVA, Tukey's HSD,  $p < 0.05$ ).

**(B)** qRT-PCR analysis of *MpDIR* and *MpPRX* transcripts in wild-type TAK1 and *nop1* mutants at 3 and 5 days post inoculation (dpi) with *P. palmivora* ARI-td in 3 week-old plants. Expression was quantified relative to pathogen biomass (*PpEF1a* and *PpWS21*). Different letters indicate statistically significant differences in transcript abundance (ANOVA, Tukey's HSD,  $p < 0.05$ ).

## SUPPORTING REFERENCES:

- [1] Evangelisti E, Gogleva A, Hainaux T, Doumane M, Tulin F, Quan C, Yunusov T, Floch K, Schornack S. Time-resolved dual root-microbe transcriptomics reveals early induced *Nicotiana benthamiana* genes and conserved infection-promoting *Phytophthora palmivora* effectors. *BMC Biology* 2017; 15(1): 39. doi: 10.1186/s12915-017-0379-1
- [2] Ishizaki K, Mizutani M, Shimamura M, Nishihama R, Kohchi T. Essential role of the E3 ubiquitin ligase *nopperabo1* in schizogenous intercellular space formation in the liverwort *Marchantia polymorpha*. *Plant Cell* 2013; 25(10): 4075-84
- [3] Kanazawa T, Era A, Minamino N, Shikano Y, Fujimoto M, Uemura T, Nishihama R, Yamato KT, Ishizaki K, Nishiyama T, Kohchi T, Nakano A, Ueda T. SNARE molecules in *Marchantia polymorpha*: unique and conserved features of the membrane fusion machinery. *Plant and Cell Physiology* 2016; 57(2): 307-24.
- [4] Chaparro-Garcia A, Wilkinson RC, Gimenez-Ibanez S, Findlay K, Coffey MD, Zipfel C, Rathjen JP, Kamoun S, Schornack S. The receptor-like kinase *SERK3/BAK1* is required for basal resistance against the late blight pathogen *phytophthora infestans* in *Nicotiana benthamiana*. *PLoS One* 2011; 6(1): e16608. doi: 10.1371/journal.pone.0016608
- [5] Le Fevre R, O'Boyle B, Moscou MJ, Schornack S. Colonization of barley by the broad-host hemibiotrophic pathogen *Phytophthora palmivora* uncovers a leaf development-dependent involvement of *Mlo*. *Molecular Plant Microbe Interactions* 2016; 29(5): 385-95.
- [6] Saint-Marcoux D, Proust H, Dolan L, Langdale JA. Identification of reference genes for real-time quantitative PCR experiments in the liverwort *Marchantia polymorpha*. *PLoS One* 2015; 10(3): e0118678. doi: 10.1371/journal.pone.0118678.
- [7] Schoina C, Bouwmeester K, Govers F: Infection of a tomato cell culture by *Phytophthora infestans*; a versatile tool to study *Phytophthora*-host interactions. *Plant Methods* 2017; 13:88.

- [8] Castro A, Vidal S, Ponce de Leon I. Moss pathogenesis-related-10 protein enhances resistance to *Pythium irregular* in *Physcomitrella patens* and *Arabidopsis thaliana*. *Frontiers in Plant Science* 2016; 7:580. doi: 10.3389/fpls.2016.00580
- [9] Tamura K, Stecher G, Peterson D, Filipski A, Kumar S. MEGA6: Molecular evolutionary genetics analysis version 6.0. *Molecular Biology and Evolution* 2013; 30(12): 2725-29
- [10] Ali SS, Shao J, Lary DJ, Kronmiller BA, Shen D, Strem MD, Amoako-Attah I, Akrofi AY, Begoude BAD, ten Hoopen GM, Coulibaly K, Kebe BI, Melnick RL, Guiltinan MJ, Tyler BM, Meinhardt LW, Bailey BA. *Phytophthora megakarya* and *Phytophthora palmivora*, closely related causal agents of cacao black pod rot, underwent increases in genome sizes and gene numbers by different mechanisms. *Genome Biology and Evolution* 2017; 9(3): 536-57
- [11] Dobin A, Davis CA, Schlesinger F, Drenkow J, Zaleski C, Jha S, Batut P, Chaisson M, Gingeras TR. STAR: ultrafast universal RNA-seq aligner. *Bioinformatics* 2013; 29(1): 15-21
- [12] Liao Y, Smyth GK, Shi W. featureCounts: an efficient general purpose program for assigning sequence reads to genomic features. *Bioinformatics* 2014; 30(7): 923-30
- [13] Robinson MD, McCarthy DJ and Smyth GK. edgeR: a Bioconductor package for differential expression analysis of digital gene expression data. *Bioinformatics* 2010; 26(1): 139-140
- [14] McCarthy JD, Chen Y, Smyth GK. Differential expression analysis of multifactor RNA-Seq experiments with respect to biological variation. *Nucleic Acids Research* 2012; 40(10): 4288-4297
- [15] Lex A, Gehlenborg N, Strobel H, Vuillemot R, Pfister H. UpSet: Visualization of Intersecting Sets, *IEEE Transactions on Visualization and Computer Graphics (InfoVis '14)*, vol. 20, no. 12, pp. 1983–1992, 2014. doi:10.1109/TVCG.2014.2346248
